# Supplementary material
Source: MDPI journal article supplement (https://www.mdpi.com/2073-4433/9/6/232)
Supplement: s1 [file s1]

# PM1 chemical characterization during the ACU15 campaign, south of Mexico City

Dara Salcedo, Harry Alvarez-Ospina, Oscar Peralta, and Telma Castro

## SUPPLEMENTAL MATERIAL

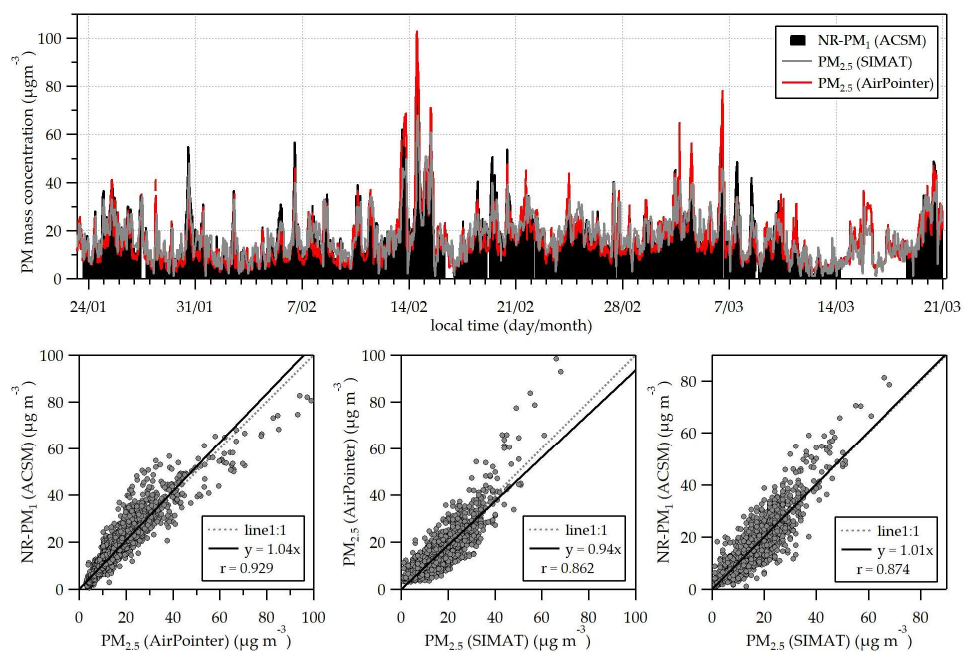

**Figure S1.** Time series and scatter plots of PM mass concentration from co-located instruments.

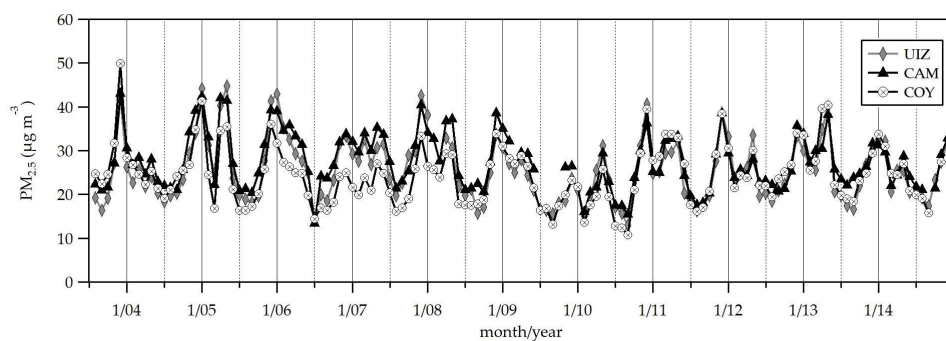

**Figure S2.** Time series of PM<sub>2.5</sub> monthly concentration at three sites of the Mexico City's Atmospheric Monitoring Network (SIMAT) [28].
